# Supplementary material
Source: MDPI journal article supplement (https://www.mdpi.com/2311-5637/9/6/499)
Supplement: s1 [file s1]

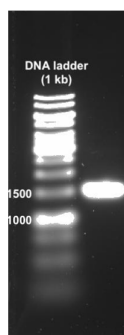

**Figure S1.** Agarose gel electrophoresis of 16S rRNA gene, amplified with universal fD1 and rP2 primers. GeneRuler 1 kb DNA Ladder (Thermo Fisher Scientific) was used as the ladder.

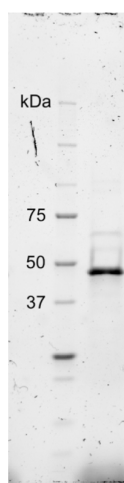

**Figure S2.** M/Lam17B purity and integrity determination with SDS-PAGE. Precision Plus Protein Dual Color Standards (Bio-Rad) molecular-mass marker was used to estimate the molecular weight of protein.

**Table S1.** Composition analysis of *Alaria esculenta* after lyophilization and acid hydrolysis.

| Carbohydrate composition (% DW) |            |            |            |            |             |                  |                 |                 |
|---------------------------------|------------|------------|------------|------------|-------------|------------------|-----------------|-----------------|
| Mannitol                        | Fucose     | Galactose  | Glucose    | Xylose     | Mannose     | Mannuronic acids | Guluronic acids | Glucuronic acid |
| 6.02 ± 0.11                     | 1.7 ± 0.01 | 1.0 ± 0.03 | 2.91 ± 0.1 | 0.3 ± 0.01 | 0.41 ± 0.01 | 7.98 ± 1.14      | 7.72 ± 1.38     | 0.86 ± 0.1      |
